# Supplementary material for: Do ectomycorrhizal exploration types reflect mycelial foraging strategies?
Source: PubMed Central journal article supplement (PMC10098516; doi:10.1111/nph.18566), 2022-11-23
Supplement: NPH-237-576-s001.pdf [file NPH-237-576-s001.pdf]

## **New *Phytologist* Supporting Information**

Article title: Do ectomycorrhizal exploration types reflect mycelial foraging strategies?

Authors: Karolina Jörgensen, Karina E. Clemmensen, Håkan Wallander, Björn D. Lindahl

Article acceptance date: 1/10/2022

The following Supporting Information is available for this article:

**Figure S1** Illustration of cafeteria setup

**Table S1** Model output from lme-models of the log-ratio of ectomycorrhizal exploration types in bags relative to roots, and in soil bags relative to sand bags

**Table S2** Relative abundance of ectomycorrhizal fungi on roots, and sand- or soil-filled ingrowth bags

**Table S3** Model output from lme-models of log-ratio of ectomycorrhizal genera in bags relative to roots roots

**Table S4** Model output from lme-models of log-ratio of ectomycorrhizal genera in soil-filled relative to sand-filled ingrowth meshbags

**Table S5** Model output from PERMANOVA testing the effect of different soil substrates on ectomycorrhizal fungal community composition in ingrowth mesh bags

**Table S6** Relative abundance of ectomycorrhizal fungi in ingrowth bags filled with different organic substrates

**Table S7** Model output from models testing the effect of substrates in ingrowth meshbags on ectomycorrhizal fungal genera

**Table S8** Output from post-hoc Tukey HSD test on ectomycorrhizal genera that displayed preference towards any soil substrate.

**Table S9** Model output from PERMANOVA testing the effect of different sand substrates on ectomycorrhizal fungal community composition in ingrowth mesh bags

**Table S10** Relative abundance of ectomycorrhizal fungi in ingrowth bags filled with sand

**Figure S1.** Illustration of cafeteria setup. Light gray point represents the location of the core that was used to extract roots, and analyse root-communities while the dark gray points represents the location of the ingrowth bags. The distance between the root core and the ingrowth bags was 0.5 m. All six substrate types (organic topsoil – low N deposition; organic topsoil – high N deposition; organic topsoil – P fertilised; mull soil; sand; sand with apatite) were included in all cafeterias and the order by which the ingrowth bags were placed in the cafeterias was randomised. In all sites (N=10), five replicate cafeterias were incubated.

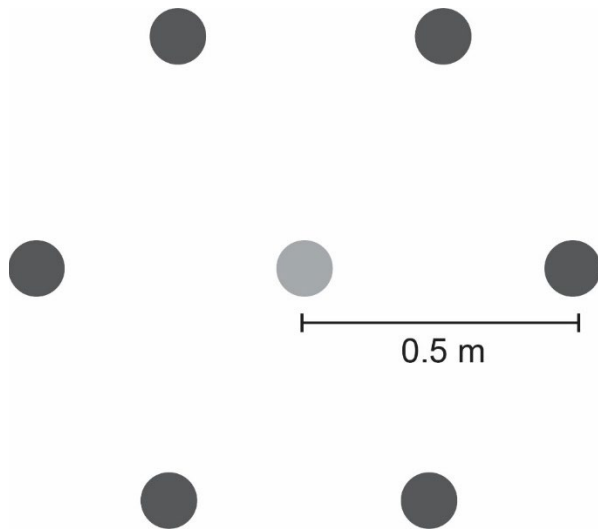

**Table S1.** Model output from mixed effects linear models testing the log-transformed ratio of the relative abundance of ectomycorrhizal fungal exploration types in ingrowth meshbags relative to roots and in soil-filled bags relative to sand-filled bags. Models were fitted with the log-ratio of relative abundances of ectomycorrhizal exploration types in ingrowth bags relative to on roots, or soil-filled bags relative to sand-filled bags as response variable, and exploration type as explanatory factor and cafeteria ID nested within site as a random variable.

|                         | Sum of squares | Mean Sq | DF | Den DF | F value | Pr(>F) |
|-------------------------|----------------|---------|----|--------|---------|--------|
| Bags vs. roots          | 7.007          | 2.336   | 3  | 7.94   | 0.458   | 0.719  |
| Soil bags vs. sand bags | 27.182         | 9.061   | 3  | 8.03   | 1.374   | 0.319  |

**Table S2.** Overall relative abundance ((root mean + bag mean)/2) and mean relative abundance of ectomycorrhizal fungal genera on roots and in ingrowth meshbags, and in soil- or sand filled bags, respectively, mean relative abundance with standard error in parentheses. Mean values are based on all cafeterias.

|                               | Overall | Roots         | Bags          | Sand bags     | Soil bags     |
|-------------------------------|---------|---------------|---------------|---------------|---------------|
| Amanita                       | 0.030   | 0.006 (0.003) | 0.054 (0.010) | 0.016 (0.009) | 0.072 (0.014) |
| Amphinema                     | 0.153   | 0.033 (0.008) | 0.272 (0.017) | 0.401 (0.035) | 0.212 (0.018) |
| Cenococcum                    | 0.120   | 0.161 (0.032) | 0.079 (0.010) | 0.112 (0.022) | 0.063 (0.010) |
| Cortinarius                   | 0.061   | 0.108 (0.027) | 0.015 (0.004) | 0.02 (0.006)  | 0.012 (0.004) |
| Hyaloscypha                   | 0.043   | 0.08 (0.019)  | 0.007 (0.004) | 0.013 (0.011) | 0.004 (0.002) |
| Hygrophorus                   | 0.010   | 0.019 (0.007) | 0 (0)         | 0 (0)         | 0 (0)         |
| Lactarius                     | 0.026   | 0.025 (0.009) | 0.026 (0.007) | 0.002 (0.001) | 0.038 (0.010) |
| Piloderma                     | 0.110   | 0.182 (0.031) | 0.037 (0.006) | 0.015 (0.004) | 0.046 (0.009) |
| Pseudotomentella              | 0.025   | 0.017 (0.011) | 0.033 (0.006) | 0.056 (0.015) | 0.022 (0.005) |
| Russula                       | 0.098   | 0.118 (0.026) | 0.077 (0.010) | 0.009 (0.002) | 0.109 (0.015) |
| Tomentella (incl. Thelephora) | 0.122   | 0.097 (0.025) | 0.146 (0.011) | 0.12 (0.017)  | 0.158 (0.014) |
| Tylospora                     | 0.072   | 0.019 (0.006) | 0.124 (0.015) | 0.135 (0.026) | 0.119 (0.018) |

**Table S3.** Model output from mixed effects linear models testing the log-transformed ratio of the relative abundance of ectomycorrhizal fungal genera in ingrowth meshbags relative to roots. Models were fitted with the log-ratio of the relative abundance of each genus (separately) in ingrowth bags relative to roots as a response variable and cafeteria ID nested within site as a random factor. \* denote significant effects after correcting for multiple testing using the Benjamini-Hochberg method.

| Genus                   | Estimate | Std. Error | df | t value | Pr(> t ) |   |
|-------------------------|----------|------------|----|---------|----------|---|
| <i>Amanita</i>          | 1.22     | 0.59       | 10 | 2.06    | 0.067    |   |
| <i>Amphinema</i>        | 2.56     | 0.32       | 30 | 7.98    | <0.001   | * |
| <i>Cenococcum</i>       | -1.04    | 0.57       | 9  | -1.82   | 0.101    |   |
| <i>Cortinarius</i>      | -2.53    | 0.56       | 9  | -4.49   | 0.002    | * |
| <i>Hyaloscypha</i>      | -3.99    | 0.55       | 9  | -7.32   | <0.001   | * |
| <i>Hygrophorus</i>      | -5.08    | 0.43       | 5  | -11.68  | <0.001   | * |
| <i>Lactarius</i>        | -0.66    | 0.71       | 6  | -0.94   | 0.385    |   |
| <i>Piloderma</i>        | -2.23    | 0.43       | 7  | -5.24   | 0.001    | * |
| <i>Pseudotomentella</i> | -1.26    | 0.66       | 6  | -1.92   | 0.106    |   |
| <i>Russula</i>          | -0.82    | 0.46       | 9  | -1.79   | 0.105    |   |
| <i>Tomentella</i>       | 0.88     | 0.31       | 33 | 2.81    | 0.008    | * |
| <i>Tylospora</i>        | 1.31     | 0.42       | 7  | 3.12    | 0.018    | * |

**Table S4.** Model output from mixed effects linear models testing the log-transformed ratio of the relative abundance of ectomycorrhizal fungal genera in soil-filled bags relative to sand-filled ingrowth meshbags. Models were fitted with the log-ratio of the relative abundance of each genus (separately) in soil-filled bags relative to sand-filled bags as a response variable and cafeteria ID nested within site as a random factor. \* denote significant effects after correcting for multiple testing using the Benjamini-Hochberg method.

| Genus                   | Estimate | Std. Error | df | t value | Pr(> t ) |   |
|-------------------------|----------|------------|----|---------|----------|---|
| <i>Amanita</i>          | 3.06     | 1.04       | 10 | 2.93    | 0.015    | * |
| <i>Amphinema</i>        | -0.63    | 0.23       | 30 | -2.76   | 0.01     | * |
| <i>Cenococcum</i>       | -0.27    | 0.44       | 37 | -0.62   | 0.54     |   |
| <i>Cortinarius</i>      | 0.03     | 0.49       | 34 | 0.06    | 0.954    |   |
| <i>Hyaloscypha</i>      | -0.07    | 0.42       | 38 | -0.17   | 0.869    |   |
| <i>Hygrophorus</i>      | 0.59     | 0.5        | 12 | 1.18    | 0.262    |   |
| <i>Lactarius</i>        | 3.37     | 0.72       | 21 | 4.69    | <0.001   | * |
| <i>Piloderma</i>        | 1.53     | 0.5        | 36 | 3.07    | 0.004    | * |
| <i>Pseudotomentella</i> | 0.14     | 0.67       | 8  | 0.2     | 0.845    |   |
| <i>Russula</i>          | 3.96     | 0.52       | 8  | 7.64    | <0.001   | * |
| <i>Tomentella</i>       | 0.44     | 0.26       | 8  | 1.67    | 0.132    |   |
| <i>Tylospora</i>        | 0.32     | 0.56       | 21 | 0.57    | 0.577    |   |

**Table S5.** Model output from PERMANOVA with 1000 permutations testing the effect of different soil substrates in ingrowth mesh bags on ectomycorrhizal fungal community composition.

|                | Df  | Sum of squares | R2    | F     | Pr(>F) |
|----------------|-----|----------------|-------|-------|--------|
| Soil substrate | 3   | 2.301          | 0.060 | 6.454 | <0.001 |
| Site no.       | 9   | 7.914          | 0.206 | 7.400 | <0.001 |
| Cafeteria ID   | 37  | 12.684         | 0.330 | 2.885 | <0.001 |
| Residual       | 131 | 15.566         | 0.405 |       |        |
| Total          | 180 | 38.464         | 1.000 |       |        |

**Table S6.** Mean relative abundance (based on all cafeterias) of ectomycorrhizal fungal genera in ingrowth meshbags containing different organic substrates, standard error in parentheses.

|                               | Relative abundance        |                            |                                         |                             |
|-------------------------------|---------------------------|----------------------------|-----------------------------------------|-----------------------------|
|                               | Organic<br>Central Sweden | Organic<br>Southern Sweden | P fertilised Organic<br>Southern Sweden | Mull soil<br>Central Sweden |
| Amanita                       | 0.06 (0.025)              | 0.130 (0.037)              | 0.067 (0.028)                           | 0.031 (0.015)               |
| Amphinema                     | 0.303 (0.043)             | 0.097 (0.023)              | 0.174 (0.029)                           | 0.274 (0.040)               |
| Cenococcum                    | 0.019 (0.010)             | 0.107 (0.027)              | 0.079 (0.022)                           | 0.047 (0.018)               |
| Cortinarius                   | 0.005 (0.002)             | 0.008 (0.003)              | 0.015 (0.009)                           | 0.020 (0.015)               |
| Hyaloscypha                   | 0.009 (0.009)             | 0 (0)                      | 0 (0)                                   | 0.006 (0.004)               |
| Hygrophorus                   | 0 (0)                     | 0 (0)                      | 0.001 (0.001)                           | 0 (0)                       |
| Lactarius                     | 0.034 (0.018)             | 0.058 (0.026)              | 0.057 (0.024)                           | 0.003 (0.001)               |
| Piloderma                     | 0.089 (0.028)             | 0.041 (0.013)              | 0.023 (0.009)                           | 0.033 (0.014)               |
| Pseudotomentella              | 0.021 (0.011)             | 0.016 (0.008)              | 0.029 (0.012)                           | 0.022 (0.007)               |
| Russula                       | 0.06 (0.016)              | 0.142 (0.033)              | 0.108 (0.030)                           | 0.124 (0.035)               |
| Tomentella (incl. Thelephora) | 0.213 (0.031)             | 0.086 (0.019)              | 0.179 (0.030)                           | 0.155 (0.026)               |
| Tylospora                     | 0.123 (0.037)             | 0.086 (0.030)              | 0.141 (0.041)                           | 0.126 (0.036)               |



**Table S7.** Model output from ANOVA of mixed effects linear models testing differences in square-root transformed relative abundance of ectomycorrhizal fungal genera in different organic substrates. \* denote significant effects after correcting for multiple testing using the Benjamini-Hochberg method.

|                         | Sum of Sq | Mean Sq | DF | Den DF | F value | Pr(>F) |   |
|-------------------------|-----------|---------|----|--------|---------|--------|---|
| <i>Amanita</i>          | 0.206     | 0.069   | 3  | 30     | 0.96    | 0.423  |   |
| <i>Amphinema</i>        | 1.565     | 0.522   | 3  | 85.7   | 14.29   | <0.001 | * |
| <i>Cenococcum</i>       | 0.601     | 0.2     | 3  | 103.9  | 6.73    | <0.001 | * |
| <i>Cortinarius</i>      | 0.008     | 0.003   | 3  | 94.6   | 0.24    | 0.865  |   |
| <i>Hyaloscypha</i>      | 0.021     | 0.007   | 3  | 110.6  | 2.14    | 0.099  |   |
| <i>Hygrophorus</i>      | 0.003     | 0.001   | 3  | 48     | 1.19    | 0.322  |   |
| <i>Lactarius</i>        | 0.204     | 0.068   | 3  | 61.2   | 1.99    | 0.125  |   |
| <i>Piloderma</i>        | 0.172     | 0.057   | 3  | 105.6  | 1.98    | 0.121  |   |
| <i>Pseudotomentella</i> | 0.013     | 0.004   | 3  | 50.3   | 0.28    | 0.836  |   |
| <i>Russula</i>          | 0.136     | 0.045   | 3  | 100.1  | 1.44    | 0.235  |   |
| <i>Tomentella</i>       | 0.996     | 0.332   | 3  | 93.9   | 9.7     | <0.001 | * |
| <i>Tylospora</i>        | 0.008     | 0.003   | 3  | 60.1   | 0.07    | 0.978  |   |

**Table S8.** Model output from post-hoc Tukey HSD test of the square-root transformed relative abundance of tree ectomycorrhizal genera that showed preference towards any of the soil substrates in ingrowth mesh bags.

|                   | Estimate | SE    | df   | t ratio | p-value |
|-------------------|----------|-------|------|---------|---------|
| <i>Amphinema</i>  |          |       |      |         |         |
| F-M               | 0.098    | 0.050 | 85.8 | 1.96    | 0.212   |
| F-P               | 0.196    | 0.050 | 86.1 | 3.86    | 0.001   |
| F-RH              | 0.309    | 0.050 | 85.5 | 6.23    | <0.001  |
| M-P               | 0.097    | 0.050 | 85.8 | 1.94    | 0.218   |
| M-RH              | 0.211    | 0.049 | 85.3 | 4.30    | <0.001  |
| P-RH              | 0.114    | 0.050 | 85.5 | 2.29    | 0.108   |
| <i>Cenococcum</i> |          |       |      |         |         |
| F-M               | -0.064   | 0.040 | 106  | -1.58   | 0.393   |
| F-P               | -0.149   | 0.041 | 107  | -3.68   | 0.002   |
| F-RH              | -0.155   | 0.041 | 107  | -3.84   | 0.001   |
| M-P               | -0.085   | 0.041 | 107  | -2.11   | 0.158   |
| M-RH              | -0.092   | 0.041 | 107  | -2.27   | 0.113   |
| P-RH              | -0.006   | 0.041 | 107  | -0.16   | 0.999   |
| <i>Tomentella</i> |          |       |      |         |         |
| F-M               | 0.134    | 0.046 | 94.5 | 2.91    | 0.023   |
| F-P               | 0.047    | 0.047 | 95.0 | 1.01    | 0.743   |
| F-RH              | 0.230    | 0.046 | 94.5 | 4.99    | <0.001  |
| M-P               | -0.087   | 0.046 | 94.5 | -1.89   | 0.240   |
| M-RH              | 0.096    | 0.046 | 94.0 | 2.10    | 0.162   |
| P-RH              | 0.183    | 0.046 | 94.5 | 3.97    | <0.001  |

**Table S9.** Model output from PERMANOVA with 1000 permutations testing the effect of different sand substrates in ingrowth mesh bags on ectomycorrhizal fungal community composition.

|                | Df | Sum of squares | R2    | F     | Pr(>F) |
|----------------|----|----------------|-------|-------|--------|
| Sand substrate | 1  | 0.083          | 0.006 | 1.045 | 0.473  |
| Site no.       | 9  | 4.330          | 0.328 | 6.046 | 0.694  |
| Cafeteria ID   | 38 | 6.071          | 0.460 | 2.008 | 0.679  |
| Residual       | 34 | 2.710          | 0.205 |       |        |
| Total          | 82 | 13.190         | 1.000 |       |        |

**Table S10.** Mean relative abundance of ectomycorrhizal genera in sand or apatite filled ingrowth meshbags, standard error in parentheses. Relative abundances are based on all cafeterias.

|                               | Sand          | Apatite       |
|-------------------------------|---------------|---------------|
| Amanita                       | 0.015 (0.009) | 0.017 (0.015) |
| Amphinema                     | 0.424 (0.049) | 0.377 (0.049) |
| Cenococcum                    | 0.113 (0.030) | 0.110 (0.032) |
| Cortinarius                   | 0.025 (0.009) | 0.015 (0.008) |
| Hyaloscypha                   | 0.002 (0.001) | 0.025 (0.023) |
| Hygrophorus                   | 0 (0)         | 0 (0)         |
| Lactarius                     | 0.004 (0.002) | 0 (0)         |
| Piloderma                     | 0.014 (0.005) | 0.017 (0.007) |
| Pseudotomentella              | 0.054 (0.016) | 0.058 (0.025) |
| Russula                       | 0.011 (0.004) | 0.007 (0.003) |
| Tomentella (incl. Thelephora) | 0.111 (0.026) | 0.129 (0.021) |
| Tylospora                     | 0.140 (0.036) | 0.129 (0.037) |
